# Supplementary material
Source: PubMed Central journal article supplement (PMC4893915)
Supplement: NIHMS771683-supplement.pdf [file NIHMS771683-supplement.pdf]

### Supplementary Materials:

**Fig S1.** Analysis of EMSA data of TEAD DBD binding to tandemly duplicated DNA. Band intensities were determined using Image J from data shown in Fig 6A (top, right in Anbanandam et al., 2006). Open diamonds correspond to one TEAD bound per 2xGT double stranded DNA. Closed triangles correspond to two molecules of bound TEAD per molecule of 2xGT DNA. Red curve is the fit derived from non-linear curve fitting routine to the Hill equation,  $y = [Y_{max} * x^n]/[(K_d)^n + x^n]$ , using Levenberg-Marquardt algorithm. Area shaded in cyan represents the 95% confidence interval.

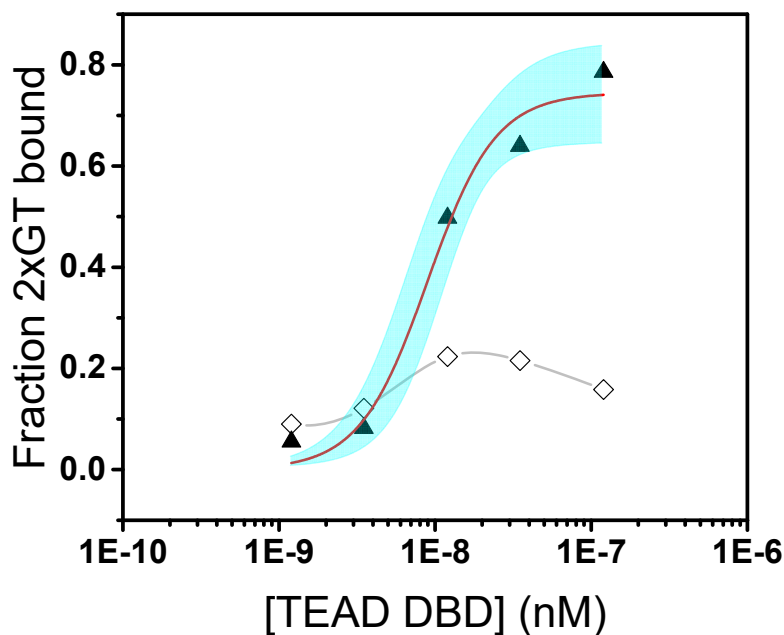

Results of curvefit:

Reduced Chi-Sqr 0.00203

Adj. R-Square 0.98221

|      | Value      | Standard Error |
|------|------------|----------------|
| Ymax | 0.74478    | 0.03571        |
| Kd   | 8.94497E-9 | 1.23305E-9     |
| n    | 2 (fixed)  | 0              |

**Fig. S2.** Organization of  $\Delta$ L1 dimers in the crystal lattice: TEA domain fold is made of domain-swapped chains. Shown here in cartoon form, is an assembly of three domain-swapped dimers from two adjacent cells.

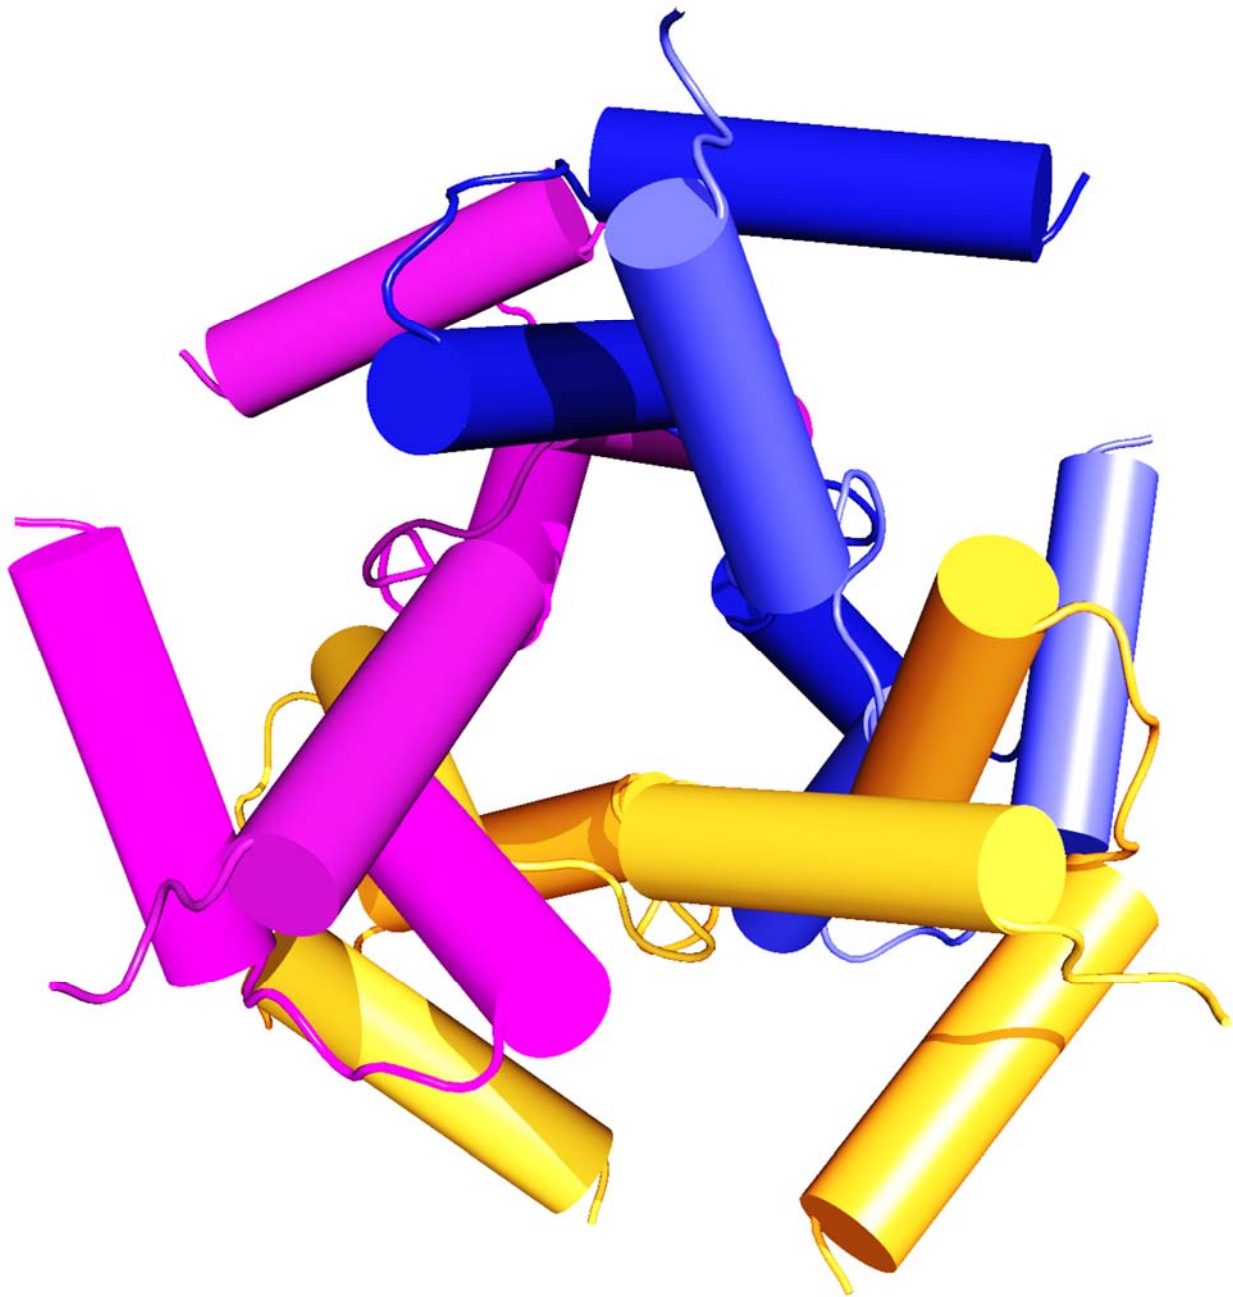

**Fig. S3.** Sephacryl S200 XK 16/60 elution profile of  $\Delta$ L1 TEAD DBD (blue trace) and TEAD DBD (brown trace) is shown with molecular weight calibration proteins (cyan trace). Molecular weight calibration proteins: BSA=bovine serum albumin (runs as monomer and dimer), Ova=ovalbumin, Chy=chymotrypsinogen, RNase=Ribonuclease, Apr=aprotinin.

Buffer: 50mM Hepes, pH 8.0, 250mM NaCl, 0.01% NaN<sub>3</sub>; flow rate: 0.25mL/min, 1.8mL/fraction. 4-7 mg of each protein was injected.

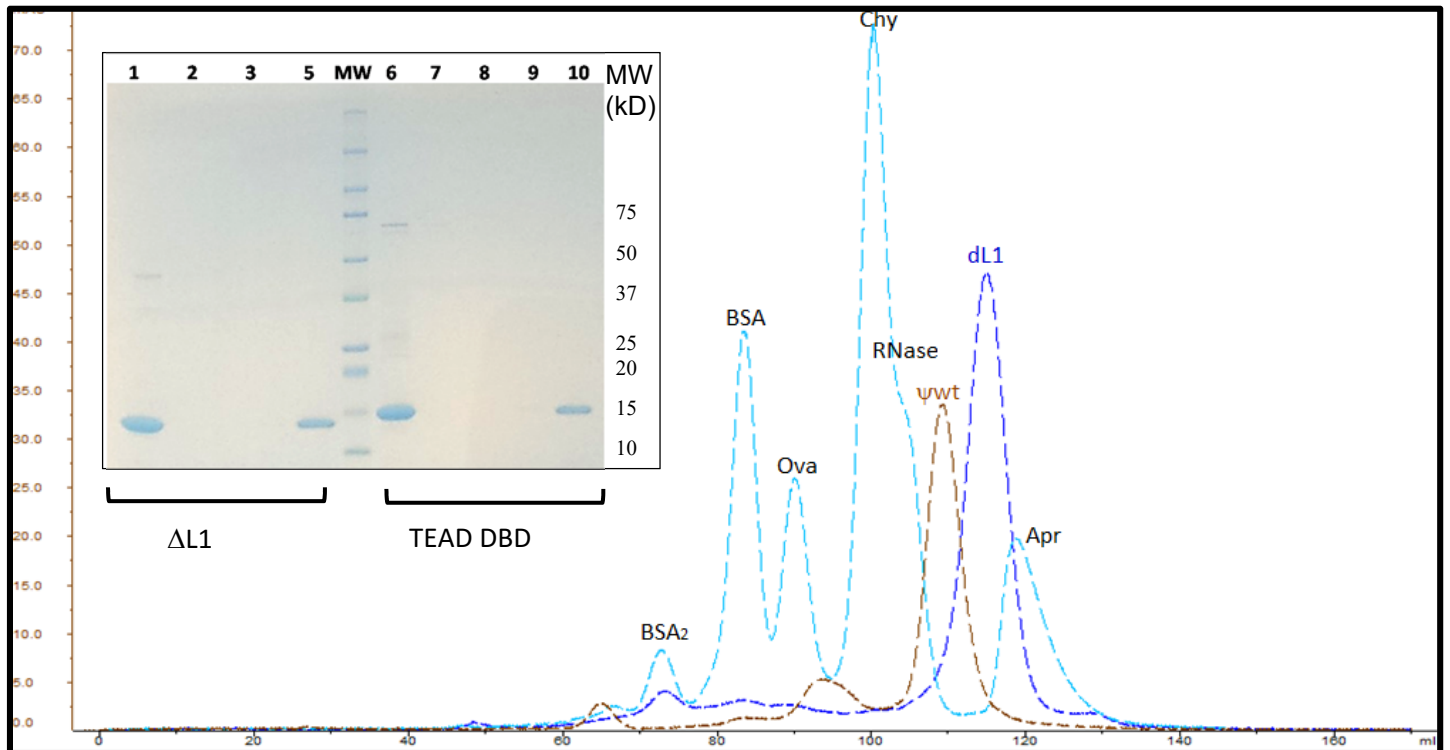

**Inset:** SDS-PAGE of SEC peak fractions. TGX 4-20% gradient gel electrophoresis.

**Lanes 1-5:**  $\Delta$ L1 TEAD DBD

1: Ni-NTA purified  $\Delta$ L1 protein- sample injected into column; 2: F#41; 3: F#46; 4: F#50  
5: F#64

MW: MW markers

**Lanes 6-10:** C27S TEAD DBD

6: Ni-NTA purified C27S protein- sample injected into column; 7: F#36; 8: F#46; 9: F#52  
10: F#61

**Fig. S4.** Fungal Tec1 DBD amino acid sequence alignment.

|                       |                                                                 |
|-----------------------|-----------------------------------------------------------------|
| <b>C_albicans</b>     | WSDDVEEAFEEVLRLIPKSGLNKIKIA--GRSCGRNELISDYIFAKTGKFRTRKQVSSHIQVI |
| <b>Saccharomyces</b>  | WSEKVEEAFLEALRLIMKNGTTKIKIR--NANFGRNELISLYIKHKTNEFRTKKQISSHIQVW |
| <b>A_fumigatus</b>    | WSELEDAFQQALEANPPMGRRKWSER--GKSYGRNELIAEYIYKVTGKKRTRKQVSSHLQVL  |
| <b>P_marneffeii</b>   | WSDALEDAFQQALEANPPMGRRKWSER--GKSYGRNELIAEYIYKLTGKRRTRKQVSSHLQVL |
| <b>Yarrowia</b>       | WSTDVEQAFMEALKVIPCVGRRKIVIN--GRTCGRNELISEYIFKKTGKQRTRKQVSSHIQVL |
| <b>TEAD consensus</b> | WSPDIEQSFQEALAIYPPCGRRKIILSDEGKMYGRNELIARYIKLRTGKTRTRKQVSSHIQVL |

A shortening of the L1 loop in nature: The amino acids 'DE' (AspGlu) within the L1 loop of TEAD consensus sequence are absent in fungal TEC1. L1 loop residues that are missing in  $\Delta$ L1 TEAD DBD are boxed in red.

**Table S.1.** Domain swapping contacts for  $\Delta$ L1 TEAD DBD

| Chain/residue                         | Atom | Chain/residue | Atom | Distance (Å) |
|---------------------------------------|------|---------------|------|--------------|
| <b><i>L1 loop H-bonds:</i></b>        |      |               |      |              |
| B0041-MET                             | N    | C0039-GLY     | O    | 2.84         |
| B0044-ARG                             | NE   | C0037-TYR     | O    | 2.71         |
| B0044-ARG                             | NH2  | C0037-TYR     | O    | 2.88         |
| <b><i>H1 H-bonds:</i></b>             |      |               |      |              |
| B0051-TYR                             | OH   | C0032-GLU     | OE1  | 2.77         |
| B0058-LYS                             | NZ   | C0025-ASP     | OD2  | 2.8          |
| B0060-ARG                             | NE   | C0021-VAL     | O    | 2.81         |
| B0060-ARG                             | NH2  | C0021-VAL     | O    | 2.99         |
| B0068-HIS                             | NE2  | C0027-GLU     | OE1  | 2.67         |
| <b><i>Non-bonded L1 contacts:</i></b> |      |               |      |              |
| C0039-GLY                             | C    | B0041-MET     | N    | 3.8          |
| C0039-GLY                             | O    | B0041-MET     | N    | 2.84         |
| C0039-GLY                             | O    | B0041-MET     | CA   | 3.73         |
| C0038-PRO                             | O    | B0041-MET     | CB   | 3.3          |
| C0039-GLY                             | O    | B0041-MET     | CB   | 3.64         |
| C0038-PRO                             | O    | B0041-MET     | CG   | 3.77         |
| C0038-PRO                             | O    | B0041-MET     | SD   | 3.22         |
| C0038-PRO                             | O    | B0044-ARG     | CG   | 3.6          |
| C0037-TYR                             | O    | B0044-ARG     | CD   | 3.88         |
| C0038-PRO                             | O    | B0044-ARG     | CD   | 3.58         |
| C0037-TYR                             | C    | B0044-ARG     | NE   | 3.67         |
| C0037-TYR                             | O    | B0044-ARG     | NE   | 2.71         |
| C0038-PRO                             | C    | B0044-ARG     | NE   | 3.51         |
| C0038-PRO                             | O    | B0044-ARG     | NE   | 3.4          |
| C0039-GLY                             | N    | B0044-ARG     | NE   | 3.75         |
| C0034-LEU                             | CD1  | B0044-ARG     | CZ   | 3.85         |
| C0037-TYR                             | O    | B0044-ARG     | CZ   | 3.19         |
| C0038-PRO                             | C    | B0044-ARG     | CZ   | 3.84         |
| C0039-GLY                             | N    | B0044-ARG     | CZ   | 3.7          |
| C0034-LEU                             | O    | B0044-ARG     | NH2  | 3.37         |
| C0034-LEU                             | CG   | B0044-ARG     | NH2  | 3.89         |
| C0034-LEU                             | CD1  | B0044-ARG     | NH2  | 3.52         |
| C0037-TYR                             | O    | B0044-ARG     | NH2  | 2.88         |

|           |     |           |     |      |
|-----------|-----|-----------|-----|------|
| C0033-ALA | CB  | B0048-ILE | CG1 | 3.87 |
| C0030-PHE | CD1 | B0048-ILE | CG2 | 3.74 |
| C0033-ALA | CB  | B0048-ILE | CG2 | 3.79 |
| C0034-LEU | CD1 | B0048-ILE | CD1 | 3.79 |
| C0029-SER | O   | B0051-TYR | CD2 | 3.53 |
| C0033-ALA | CB  | B0051-TYR | CD2 | 3.67 |
| C0036-ILE | CD1 | B0051-TYR | CE1 | 3.62 |
| C0029-SER | O   | B0051-TYR | CE2 | 3.44 |
| C0032-GLU | CB  | B0051-TYR | CE2 | 3.86 |
| C0032-GLU | OE1 | B0051-TYR | CE2 | 3.69 |
| C0032-GLU | OE1 | B0051-TYR | CZ  | 3.7  |
| C0036-ILE | CD1 | B0051-TYR | CZ  | 3.9  |
| C0032-GLU | CB  | B0051-TYR | OH  | 3.55 |
| C0032-GLU | CD  | B0051-TYR | OH  | 3.78 |
| C0032-GLU | OE1 | B0051-TYR | OH  | 2.77 |
| C0029-SER | OG  | B0055-ARG | CB  | 3.72 |
| C0025-ASP | O   | B0056-THR | CG2 | 3.67 |
| C0029-SER | OG  | B0056-THR | CG2 | 3.33 |
| C0025-ASP | OD2 | B0058-LYS | CD  | 3.76 |
| C0026-ILE | CG1 | B0058-LYS | CD  | 3.78 |
| C0026-ILE | CD1 | B0058-LYS | CD  | 3.52 |
| C0025-ASP | OD2 | B0058-LYS | CE  | 3.45 |
| C0023-SER | OG  | B0058-LYS | NZ  | 3.61 |
| C0025-ASP | CG  | B0058-LYS | NZ  | 3.27 |
| C0025-ASP | OD1 | B0058-LYS | NZ  | 3    |
| C0025-ASP | OD2 | B0058-LYS | NZ  | 2.8  |
| C0022-TRP | CZ3 | B0060-ARG | CG  | 3.83 |
| C0021-VAL | C   | B0060-ARG | NE  | 3.69 |
| C0021-VAL | O   | B0060-ARG | NE  | 2.81 |
| C0021-VAL | CG1 | B0060-ARG | NE  | 3.72 |
| C0021-VAL | CG2 | B0060-ARG | NE  | 3.86 |
| C0026-ILE | CD1 | B0060-ARG | NE  | 3.59 |
| C0021-VAL | O   | B0060-ARG | CZ  | 3.32 |
| C0026-ILE | CD1 | B0060-ARG | CZ  | 3.37 |
| C0021-VAL | C   | B0060-ARG | NH2 | 3.84 |
| C0021-VAL | O   | B0060-ARG | NH2 | 2.99 |
| C0026-ILE | CD1 | B0060-ARG | NH2 | 3.05 |
| C0022-TRP | CZ2 | B0064-GLN | C   | 3.53 |
| C0022-TRP | CZ2 | B0064-GLN | O   | 3.22 |
| C0021-VAL | CG1 | B0064-GLN | NE2 | 3.26 |
| C0021-VAL | CG2 | B0064-GLN | NE2 | 3.44 |
| C0022-TRP | CE2 | B0068-HIS | CB  | 3.87 |
| C0022-TRP | CZ2 | B0068-HIS | CB  | 3.57 |

|           |     |           |     |      |
|-----------|-----|-----------|-----|------|
| C0022-TRP | CE2 | B0068-HIS | CG  | 3.71 |
| C0022-TRP | CE2 | B0068-HIS | CG  | 3.72 |
| C0022-TRP | NE1 | B0068-HIS | CG  | 3.87 |
| C0022-TRP | CZ2 | B0068-HIS | CG  | 3.85 |
| C0022-TRP | CD1 | B0068-HIS | CD2 | 3.71 |
| C0022-TRP | CE2 | B0068-HIS | CD2 | 3.32 |
| C0022-TRP | NE1 | B0068-HIS | CD2 | 3.08 |
| C0022-TRP | CZ2 | B0068-HIS | CD2 | 3.66 |
| C0027-GLU | OE1 | B0068-HIS | CD2 | 3.59 |
| C0030-PHE | CD2 | B0068-HIS | CD2 | 3.66 |
| C0030-PHE | CE2 | B0068-HIS | CD2 | 3.43 |
| C0030-PHE | CZ  | B0068-HIS | CD2 | 3.62 |
| C0022-TRP | CD1 | B0068-HIS | ND1 | 3.84 |
| C0022-TRP | CE2 | B0068-HIS | ND1 | 3.76 |
| C0022-TRP | NE1 | B0068-HIS | ND1 | 3.71 |
| C0022-TRP | CG  | B0068-HIS | CE1 | 3.88 |
| C0022-TRP | CG  | B0068-HIS | CE1 | 3.71 |
| C0022-TRP | CD1 | B0068-HIS | CE1 | 3.49 |
| C0022-TRP | NE1 | B0068-HIS | CE1 | 3.69 |
| C0027-GLU | OE1 | B0068-HIS | CE1 | 3.62 |
| C0022-TRP | CG  | B0068-HIS | NE2 | 3.75 |
| C0022-TRP | CD1 | B0068-HIS | NE2 | 3.11 |
| C0022-TRP | CE2 | B0068-HIS | NE2 | 3.6  |
| C0022-TRP | NE1 | B0068-HIS | NE2 | 2.96 |
| C0027-GLU | CD  | B0068-HIS | NE2 | 3.71 |
| C0027-GLU | OE1 | B0068-HIS | NE2 | 2.67 |
| C0030-PHE | CE1 | B0069-ILE | CG1 | 3.67 |
| C0030-PHE | CZ  | B0069-ILE | CG1 | 3.54 |
| C0034-LEU | CD1 | B0069-ILE | CG1 | 3.87 |
| C0027-GLU | OE2 | B0072-LEU | CD2 | 3.7  |
| C0030-PHE | CE2 | B0072-LEU | CD2 | 3.69 |
